# Supplementary material for: Automatic Seizure Detection and Prediction Based on Brain Connectivity Features and a CNNs Meet Transformers Classifier
Source: MDPI journal article supplement (doi:10.3390/brainsci13050820), 2023-05-18
Supplement: s1 [file s1]

## Supplementary material

In the pre-experiment, two band-pass filters were applied to the EEG recordings for seizure detection and prediction tasks. One had a frequency range from 0.5 to 40 Hz while the other had a range from 0.5 to 100 Hz. Then, the classification results based on the proposed method was described in Table S1 and Table S2.

**Table S1.** Classification results with filtering at 0.5-40 Hz.

| Task       | Window length (s) | SSM     |         |         | SIM     |         |         | CSM     |         |         |
|------------|-------------------|---------|---------|---------|---------|---------|---------|---------|---------|---------|
|            |                   | ACC (%) | Sen (%) | Spe (%) | ACC (%) | Sen (%) | Spe (%) | ACC (%) | Sen (%) | Spe (%) |
| detection  | 1                 | 98.07   | 98.02   | 98.13   | 94.51   | 94.06   | 94.98   | 81.34   | 82.01   | 80.70   |
|            | 8                 | 99.29   | 99.29   | 99.33   | 99.07   | 98.99   | 99.14   | 95.76   | 96.56   | 94.95   |
| prediction | 1                 | 94.06   | 94.04   | 94.06   | 96.64   | 97.08   | 96.20   | 72.53   | 73.15   | 71.89   |
|            | 8                 | 98.99   | 98.99   | 99.07   | 99.76   | 99.81   | 99.72   | 85.98   | 86.54   | 85.41   |

**Table S2.** Classification results with filtering at 0.5-100 Hz.

| Task       | Window length (s) | SSM     |         |         | SIM     |         |         | CSM     |         |         |
|------------|-------------------|---------|---------|---------|---------|---------|---------|---------|---------|---------|
|            |                   | ACC (%) | Sen (%) | Spe (%) | ACC (%) | Sen (%) | Spe (%) | ACC (%) | Sen (%) | Spe (%) |
| detection  | 1                 | 100     | 100     | 100     | 99.87   | 99.75   | 99.89   | 96.67   | 97.00   | 96.34   |
|            | 8                 | 100     | 100     | 100     | 99.98   | 100     | 99.96   | 99.27   | 99.51   | 99.03   |
| prediction | 1                 | 90.67   | 88.56   | 92.78   | 68.65   | 70.04   | 67.26   | 62.68   | 63.80   | 61.56   |
|            | 8                 | 93.58   | 93.01   | 94.15   | 76.43   | 77.64   | 75.22   | 67.61   | 67.95   | 67.27   |

Table S1 describes the results with a filtering range of 0.5-40 Hz. Table S2 describes the results with a filtering range of 0.5-100 Hz. Comparing the two results, we found an interesting phenomenon: the bandwidth expansion contributed a lot to seizure detection task but had a counterproductive effect on seizure prediction task. Given that seizure is a rapid abnormal discharge process, we speculated that the information included in the high frequency band ( $> 40$  Hz) might be very useful to mark the ictal phase, which could effectively distinguish between ictal and inter-ictal phases.

For pre-ictal EEG signal, the pre-ictal period was defined as 15-30 minutes prior to seizure onset. Blanco, et al. [52] reported that the signal energy transferred from the low-frequency to the high-frequency band in pre-ictal phase. They stated that the greater the entropy was, the more energy flowed into this band. After checking their results carefully, we found that during 15-30 minutes prior to seizures, the overall rate of entropy increase was very slow. It wasn't until 5 minutes before the onset that it began to rapidly climb. This indicated that there has not yet been a significant transfer of signal energy from low to high frequency during 15 and 30 minutes before the onset. That was to say, a large amount of valid EEG information was very likely to be still contained in low and mid frequency bands. Therefore, the gamma band extension from 30-40 Hz to 30-100 Hz might not capture more useful information marking pre-ictal EEG signals but introduce more high-frequency noise, which exactly explained the counterproductive effect of the gamma extension on the seizure prediction.

Based on the above discussion, we finally decided to apply a band-pass filter of 0.5-100 Hz on seizure detection task, and a band-pass filter of 0.5-40 Hz on seizure prediction task. Although gamma band is limited, ranging from 30 only to 40 Hz, we believed that the useful information could be still extracted to mark pre-ictal signals and high-frequency noise would be removed.

**Table S3.** The architecture of CMT network. The feature image was resized to the input resolution of  $160 \times 160$ . The output size corresponds to the input resolution. Convolutions and CMT blocks are shown in brackets with the number of stacked blocks.  $H_i$  and  $k_i$  are the number of heads and reduction rates in LMHSA of stage  $i$ , respectively.  $R_i$  denotes the expansion ratio in IRFFN of stage  $i$ .

| Output Size    | Layer Name      | CMT <sup>[21]</sup>                                                                      |
|----------------|-----------------|------------------------------------------------------------------------------------------|
| $80 \times 80$ | Stem            | $3 \times 3, 32$ , stride 2<br>$[3 \times 3, 32] \times 2$                               |
| $40 \times 40$ | Patch Embedding | $2 \times 2, 64$ , stride 2                                                              |
| Stage 1        | LPU             | $\begin{bmatrix} 3 \times 3, 64 \\ H_1 = 1, k_1 = 8 \\ R_1 = 4 \end{bmatrix} \times 3$   |
|                | LMHSA           |                                                                                          |
|                | IRFFN           |                                                                                          |
| $20 \times 20$ | Patch Embedding | $2 \times 2, 128$ , stride 2                                                             |
| Stage 2        | LPU             | $\begin{bmatrix} 3 \times 3, 128 \\ H_2 = 2, k_2 = 4 \\ R_2 = 4 \end{bmatrix} \times 3$  |
|                | LMHSA           |                                                                                          |
|                | IRFFN           |                                                                                          |
| $10 \times 10$ | Patch Embedding | $2 \times 2, 256$ , stride 2                                                             |
| Stage 3        | LPU             | $\begin{bmatrix} 3 \times 3, 256 \\ H_3 = 4, k_3 = 2 \\ R_3 = 4 \end{bmatrix} \times 16$ |
|                | LMHSA           |                                                                                          |
|                | IRFFN           |                                                                                          |
| $5 \times 5$   | Patch Embedding | $2 \times 2, 512$ , stride 2                                                             |
| Stage 4        | LPU             | $\begin{bmatrix} 3 \times 3, 512 \\ H_4 = 8, k_4 = 1 \\ R_4 = 4 \end{bmatrix} \times 3$  |
|                | LMHSA           |                                                                                          |
|                | IRFFN           |                                                                                          |
| $1 \times 1$   | Projection      | $1 \times 1, 1280$                                                                       |
| $1 \times 1$   | Classifier      | Fully Connected Layer, 1000                                                              |
